# Supplementary material for: Single cell preparations of Mycobacterium tuberculosis damage the mycobacterial envelope and disrupt macrophage interactions
Source: eLife. 2023 Feb 28;12:e85416. doi: 10.7554/eLife.85416 (PMC9998084; doi:10.7554/eLife.85416)
Supplement: Supplementary file 2. [file elife-85416-supp2.xlsx]

## Sheet: Sheet1
	Supplementary file 2. PCR primers used
	Name	Primer
	M. musculus Gapdh F	AGGTCGGTGTGAACGGATTTG
	M. musculus Gapdh R	TGTAGACCATGTAGTTGAGGTCA
	M. musculus Il1b F	GCAACTGTTCCTGAACTCAACT
	M. musculus Il1b R	ATCTTTTGGGGTCCGTCAACT
	M. musculus Il6 F	TAGTCCTTCCTACCCCAATTTCC
	M. musculus Il6 R	TTGGTCCTTAGCCACTCCTTC
	M. musculus Nos2 F	GTTCTCAGCCCAACAATACAA GA
	M. musculus Nos2 R	GTGGACGGGTCGATGTCAC
	M. musculus Tnf F	CCCTCACACTCAGATCATCTTCT
	M. musculus Tnf R	GCTACGACGTGGGCTACAG
