# Supplementary figures and images for: Single cell preparations of Mycobacterium tuberculosis damage the mycobacterial envelope and disrupt macrophage interactions
Source: eLife journal article supplement (doi:10.7554/elife.85416), 2023-02-28

HN878

Erdman

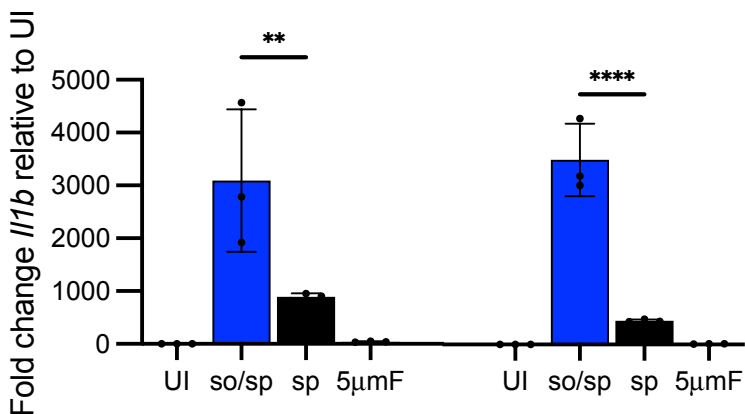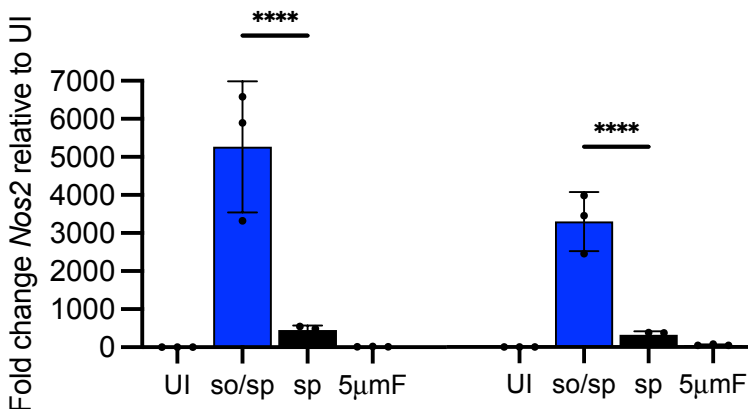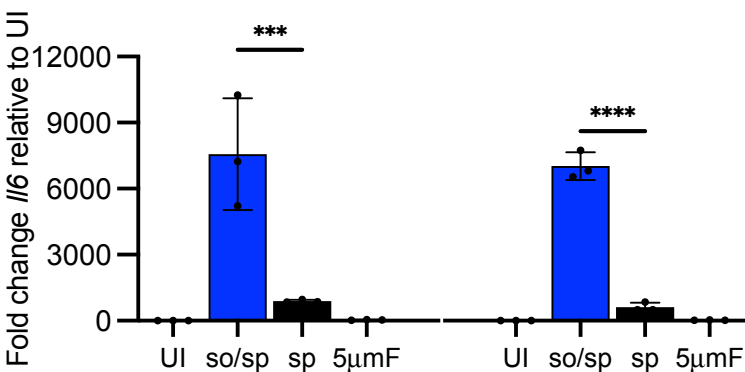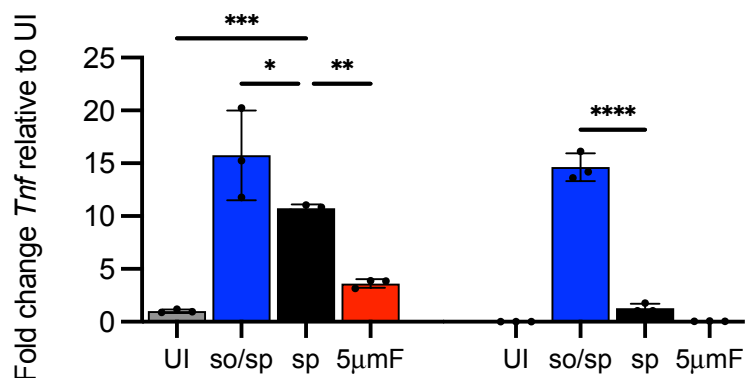

Supplement: supp [file elife-85416-supp-v1.zip]

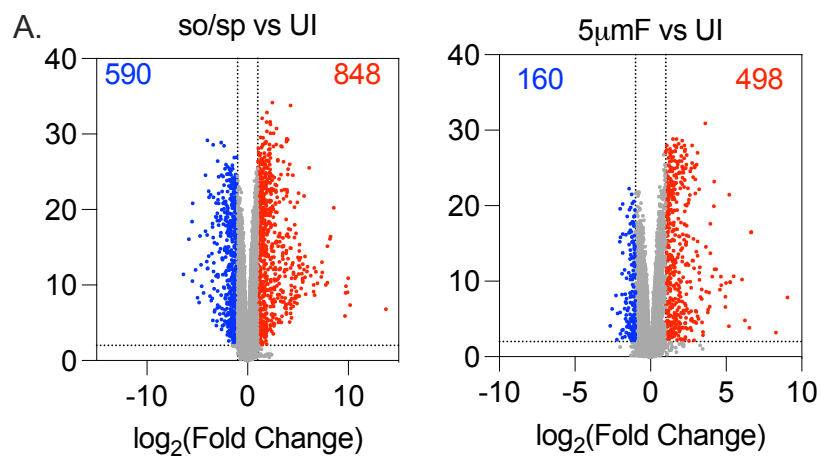

**B.**

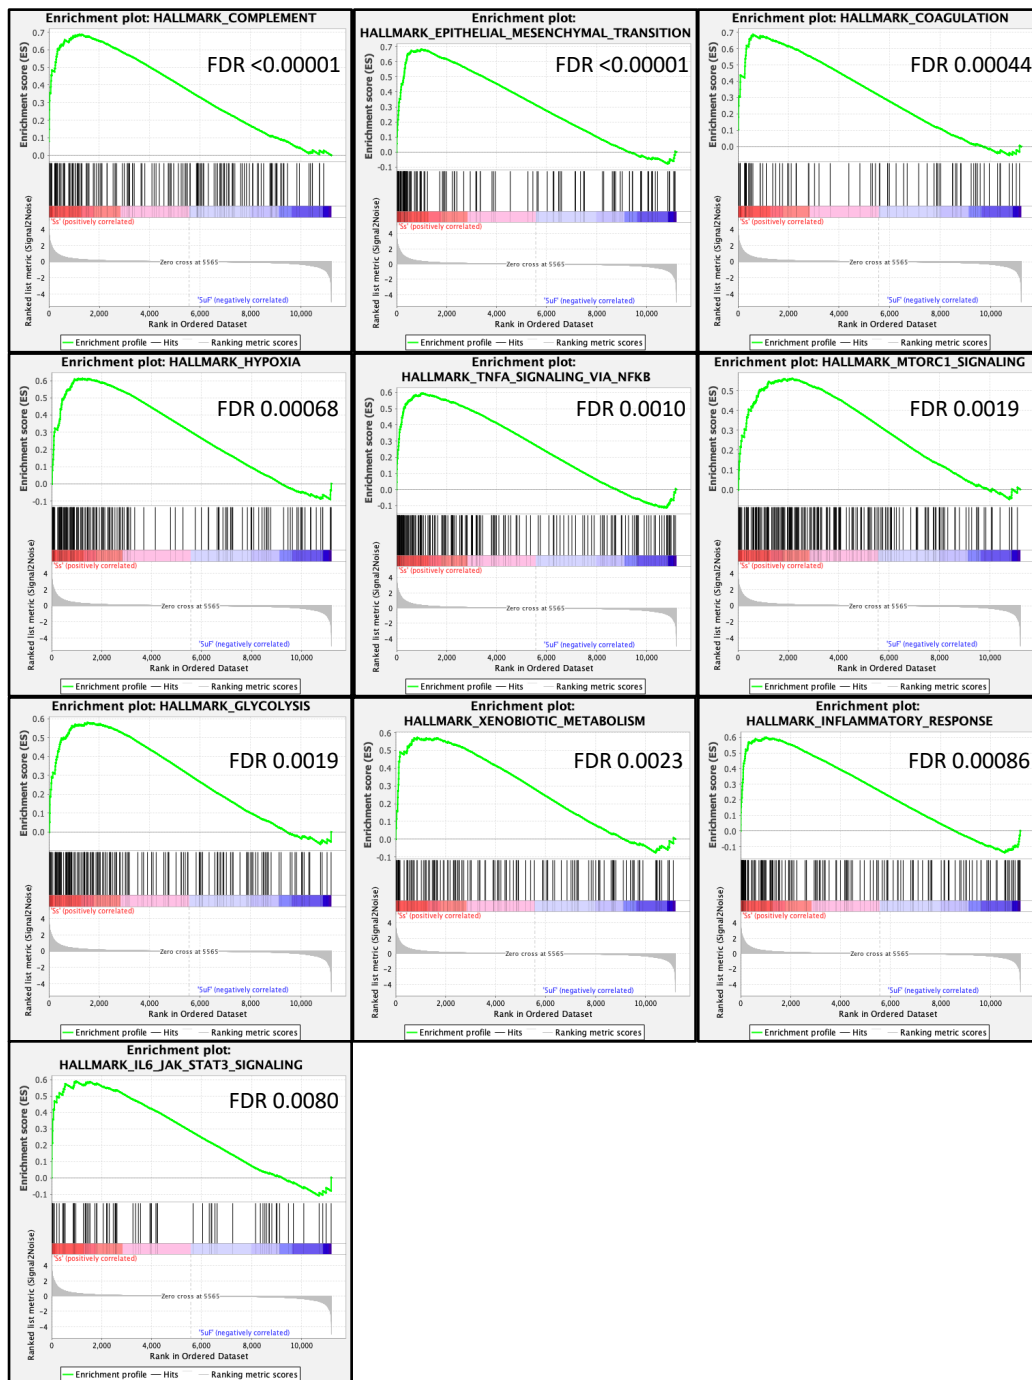

**C.**

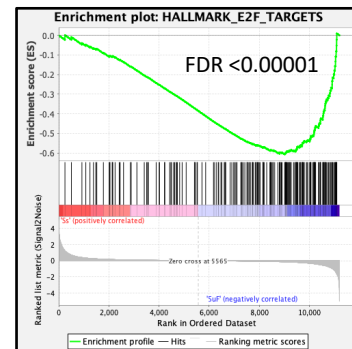

Supplement: supp [file elife-85416-supp-v1.zip]

A.

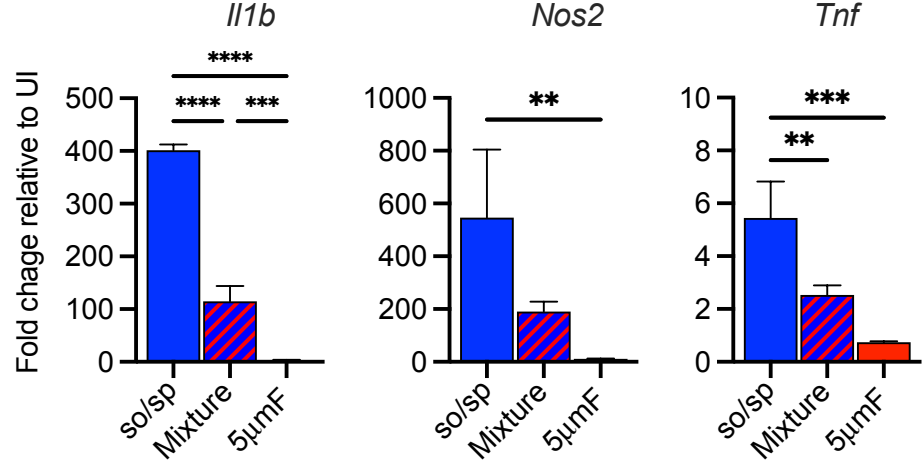

B.

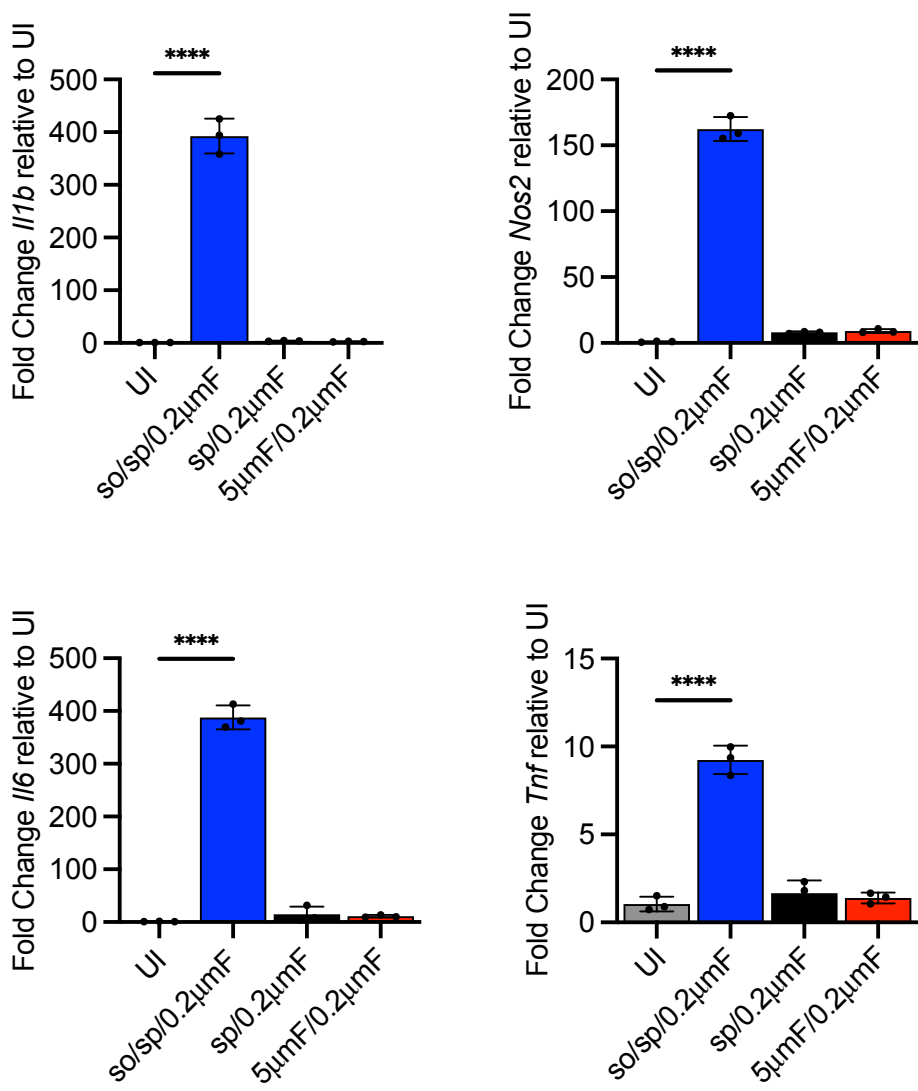

Supplement: supp [file elife-85416-supp-v1.zip]

A.

*Il1b*

*Il6*

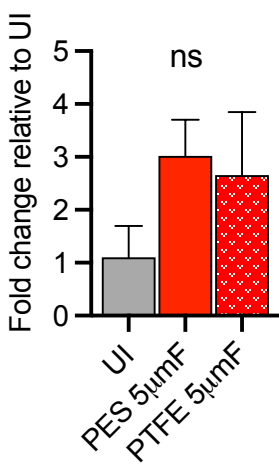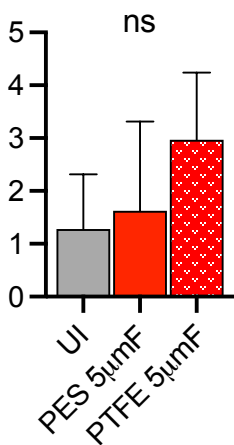

Supplement: supp [file elife-85416-supp-v1.zip]

A.

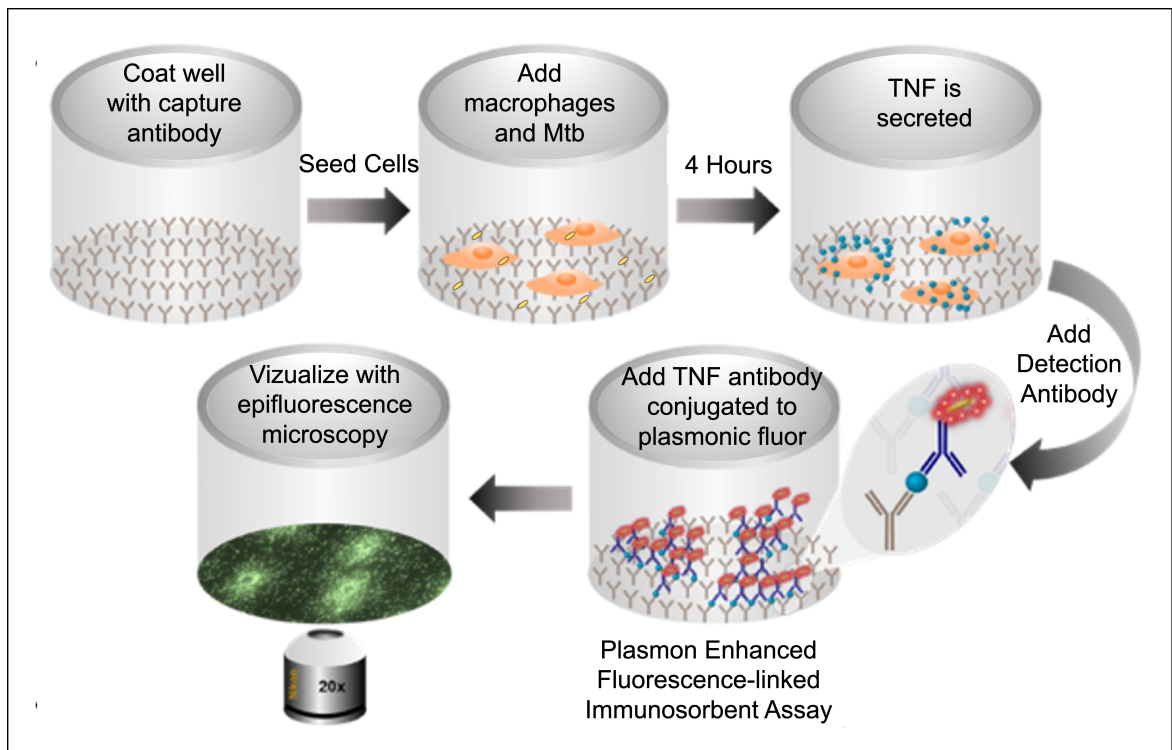

B.

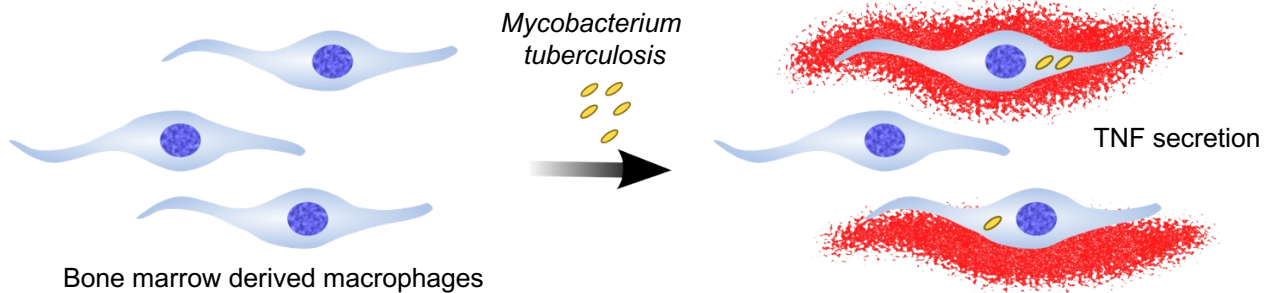

C.

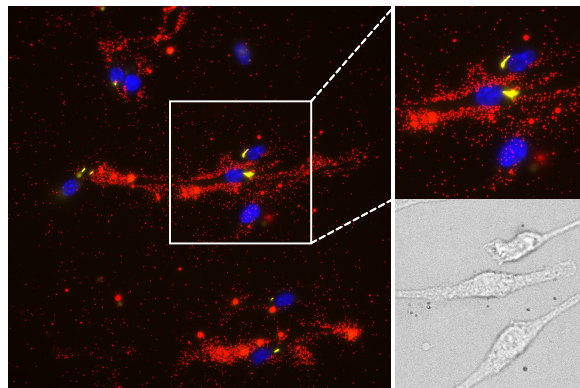

Supplement: supp [file elife-85416-supp-v1.zip]
